# Supplementary material
Source: PubMed Central journal article supplement (PMC3215905)
Supplement: NIHMS317280-supplement-Supp_Table_S1-S2___Fig_S1-S3.pdf [file NIHMS317280-supplement-Supp_Table_S1-S2___Fig_S1-S3.pdf]

| Demethylase Screen                             |                         |                   |              |
|------------------------------------------------|-------------------------|-------------------|--------------|
|                                                | Initial screen          |                   |              |
| RNAi construct                                 | Mean +/- SD             | p values          | # worms      |
| control                                        | 19.760 +/- 0.568        |                   | 86/90        |
| <b>rbr-2</b>                                   | <b>17.767 +/- 0.805</b> | <b>0.0319</b>     | <b>30/30</b> |
| <i>tag-279</i>                                 | 18.000 +/- 0.701        | 0.0323            | 30/30        |
| <i>F23D12.5</i>                                | 18.225 +/- 1.079        | 0.2650            | 28/30        |
| <i>C06H2.3</i>                                 | 18.833 +/- 0.716        | 0.2005            | 30/30        |
| <i>psr-1</i>                                   | 19.100 +/- 1.052        | 0.7186            | 30/30        |
| <i>C29F7.6</i>                                 | 19.756 +/- 1.047        | 0.8629            | 22/30        |
| <i>F29B9.2</i>                                 | 20.495 +/- 0.851        | 0.6823            | 28/30        |
| <b>F43G6.6</b>                                 | <b>22.456 +/- 0.758</b> | <b>0.0586</b>     | <b>29/30</b> |
| <b>utx-1</b>                                   | <b>23.560 +/- 1.455</b> | <b>0.0012</b>     | <b>27/30</b> |
| <b>T26A5.5</b>                                 | <b>24.104 +/- 1.259</b> | <b>0.0003</b>     | <b>28/30</b> |
| control                                        | 18.419 +/- 0.473        |                   | 52/60        |
| <i>amx-1</i>                                   | 18.954 +/- 0.604        | 0.5803            | 29/30        |
| <b>lsd-1</b>                                   | <b>22.393 +/- 0.589</b> | <b>&lt;0.0001</b> | <b>27/30</b> |
| Repeat of targets with >10% change in lifespan |                         |                   |              |
| control                                        | 17.981 +/- 0.422        |                   | 78/90        |
| <i>F43G6.6</i>                                 | 16.761 +/- 0.431        | 0.0581            | 81/90        |
| <i>lsd-1</i>                                   | 19.025 +/- 0.496        | 0.0560            | 85/90        |
| control                                        | 19.185 +/- 0.397        |                   | 89/90        |
| <b>rbr-2</b>                                   | <b>16.111 +/- 0.432</b> | <b>&lt;0.0001</b> | <b>90/90</b> |
| control                                        | 18.852 +/- 0.487        |                   | 88/90        |
| <b>utx-1</b>                                   | <b>21.652 +/- 0.584</b> | <b>&lt;0.0001</b> | <b>82/90</b> |
| <b>T26A5.5 #1</b>                              | <b>21.144 +/- 0.567</b> | <b>&lt;0.0009</b> | <b>86/90</b> |
| <b>T26A5.5 #2</b>                              | <b>21.374 +/- 0.477</b> | <b>&lt;0.0005</b> | <b>88/90</b> |

|                                             | 1                  |                 |                | 2                  |                 |                |                          |
|---------------------------------------------|--------------------|-----------------|----------------|--------------------|-----------------|----------------|--------------------------|
| <b>N2 + RNAi</b>                            | <b>Mean +/- SD</b> | <b>p values</b> | <b># worms</b> | <b>Mean +/- SD</b> | <b>p values</b> | <b># worms</b> | <b>Combined p values</b> |
| N2 control                                  | 18.158 +/- 0.525   |                 | 68/90          |                    |                 |                |                          |
| N2 <i>T26A5.5 (Adult)</i>                   | 21.173 +/- 0.624   | 0.0005          | 64/90          |                    |                 |                |                          |
| N2 control                                  | 15.716 +/- 0.343   |                 | 79/90          | 16.989 +/- 0.317   |                 | 73/95          |                          |
| N2 <i>utx-1 (L1)</i>                        | 17.697 +/- 0.386   | <0.0001         | 95/116         | 19.662 +/- 0.649   | <0.0001         | 66/93          | <0.0001                  |
| N2 control                                  | 16.540 +/- 0.417   |                 | 80/88          | 17.214 +/- 0.451   |                 | 73/95          |                          |
| N2 <i>utx-1 (Adult)</i>                     | 21.385 +/- 0.584   | <0.0001         | 60/73          | 20.813 +/- 0.564   | <0.0001         | 66/93          | <0.0001                  |
| <b>Strain</b>                               | <b>Mean +/- SD</b> | <b>p values</b> | <b># worms</b> | <b>Mean +/- SD</b> | <b>p values</b> | <b># worms</b> | <b>Combined p values</b> |
| N2                                          | 21.736 +/- 0.529   |                 | 63/90          | 20.550 +/- 0.570   |                 | 76/90          |                          |
| <i>T26A5.5(ok2364)</i>                      | 21.140 +/- 0.430   | 0.1782          | 67/90          | 20.427 +/- 0.514   | 0.7993          | 88/90          |                          |
| stDp2/+                                     | 11.771 +/- 0.385   |                 | 45/90          | 12.594 +/- 0.349   |                 | 63/92          |                          |
| stDp2/ <i>utx-1(tm3118)</i>                 | 17.684 +/- 0.355   | <0.0001         | 64/86          | 16.054 +/- 0.378   | <0.0001         | 71/92          | <0.0001                  |
| N2 control                                  | 13.717 +/- 0.509   |                 | 66/88          | 16.932 +/- 0.607   |                 | 73/90          |                          |
| N2 <i>utx-1</i>                             | 15.779 +/- 0.477   | 0.0040          | 72/85          | 20.931 +/- 0.610   | <0.0001         | 71/91          | <0.0001                  |
| <i>glp-1(e2141)</i> control                 | 16.369 +/- 0.442   | 0.0002          | 86/92          | 20.674 +/- 0.608   | <0.0001         | 89/92          | <0.0001                  |
| <i>glp-1(e2141) utx-1</i>                   | 18.191 +/- 0.432   | 0.0088          | 84/92          | 23.960 +/- 0.666   | 0.0006          | 89/92          | <0.0001                  |
| <b>Statistical comparison</b>               |                    |                 |                |                    |                 |                |                          |
| N2 <i>utx-1</i> / <i>glp-1 utx-1</i>        |                    | 0.0005          |                |                    | <0.0001         |                | <0.0001                  |
| Two-way ANOVA N2/ <i>glp-1 +/- utx-1</i>    |                    | 0.0244          |                |                    | 0.5740          |                | 0.0738                   |
| N2 control                                  | 15.378 +/- 0.453   |                 | 75/93          |                    |                 |                |                          |
| N2 <i>utx-1</i>                             | 18.940 +/- 0.666   | <0.0001         | 68/92          |                    |                 |                |                          |
| <i>eat-2(ad1116)</i> control                | 17.025 +/- 0.463   | 0.0219          | 80/88          |                    |                 |                |                          |
| <i>eat-2(ad1116) utx-1</i>                  | 19.875 +/- 0.524   | <0.0001         | 85/93          |                    |                 |                |                          |
| <b>Statistical comparison</b>               |                    |                 |                |                    |                 |                |                          |
| N2 <i>utx-1</i> / <i>eat-2 utx-1</i>        |                    | 0.5274          |                |                    |                 |                |                          |
| Two-way ANOVA N2/ <i>eat-2 +/- utx-1</i>    |                    | <0.0001         |                |                    |                 |                |                          |
| N2 control                                  | 19.627 +/- 0.659   |                 | 71/93          | 21.369 +/- 0.479   |                 | 74/90          |                          |
| N2 <i>utx-1</i>                             | 25.162 +/- 0.785   | <0.0001         | 64/92          | 24.452 +/- 0.641   | <0.0001         | 75/90          | <0.0001                  |
| <i>daf-16(mu86)</i> control                 | 15.596 +/- 0.284   | <0.0001         | 78/92          | 16.224 +/- 0.370   | <0.0001         | 85/90          | <0.0001                  |
| <i>daf-16(mu86) utx-1</i>                   | 16.429 +/- 0.255   | 0.0195          | 69/92          | 16.614 +/- 0.337   | <0.6034         | 88/90          | <0.0640                  |
| <b>Statistical comparison</b>               |                    |                 |                |                    |                 |                |                          |
| N2 <i>utx-1</i> / <i>daf-16(mu86) utx-1</i> |                    | <0.0001         |                |                    | <0.0001         |                | <0.0001                  |
| Two-way ANOVA N2/ <i>daf-16 +/- utx-1</i>   |                    | <0.0001         |                |                    | 0.0036          |                | <0.0001                  |
| N2 control                                  | 21.369 +/- 0.479   |                 | 74/90          | 19.627 +/- 0.659   |                 | 71/93          |                          |
| N2 <i>utx-1</i>                             | 24.452 +/- 0.641   | <0.0001         | 75/90          | 25.162 +/- 0.785   | <0.0001         | 64/92          | <0.0001                  |
| <i>daf-2(e1370)</i> control                 | 39.792 +/- 1.056   | <0.0001         | 81/90          | 27.431 +/- 1.535   | <0.0001         | 74/90          | <0.0001                  |
| <i>daf-2(e1370) utx-1</i>                   | 39.226 +/- 1.212   | 0.5367          | 59/92          | 28.893 +/- 1.302   | 0.6484          | 63/91          | 0.7153                   |
| <b>Statistical comparison</b>               |                    |                 |                |                    |                 |                |                          |
| N2 <i>utx-1</i> / <i>daf-2(e1370) utx-1</i> |                    | <0.0001         |                |                    | <0.0001         |                | <0.0001                  |
| Two-way ANOVA N2/ <i>daf-2 +/- utx-1</i>    |                    | 0.0393          |                |                    | 0.0777          |                | 0.0207                   |

Supplementary Table 2

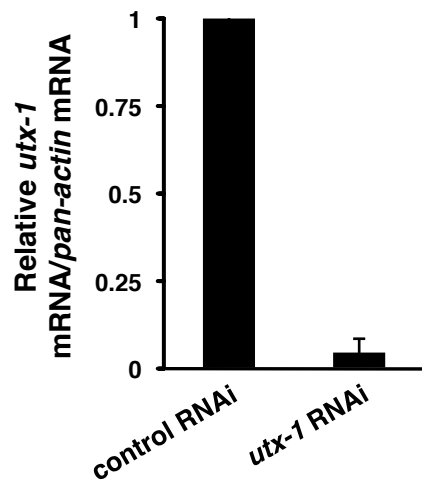

Supplementary Fig. 1

**A**

**control RNAi**

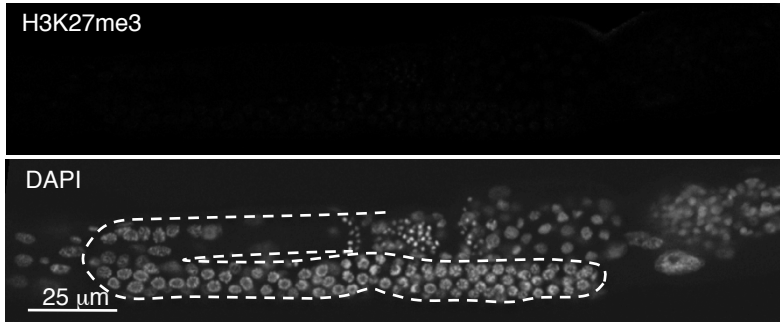

***utx-1* RNAi**

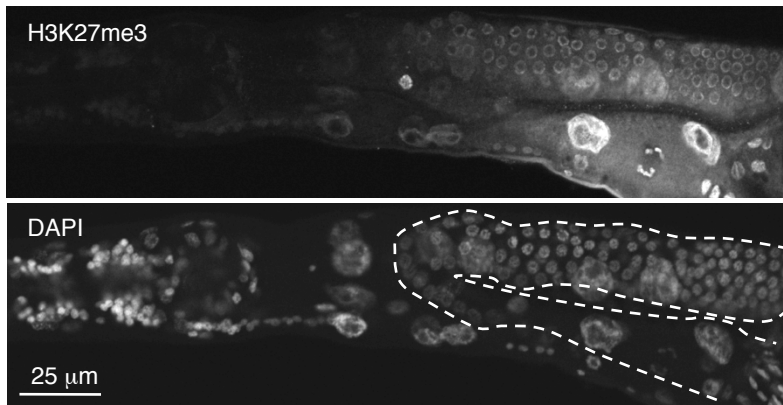

**B**

**control RNAi**

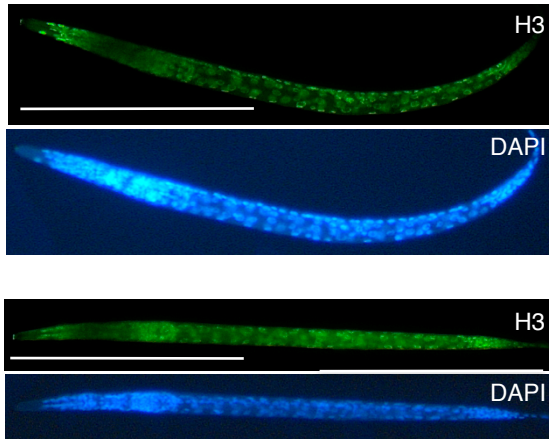

***utx-1* RNAi**

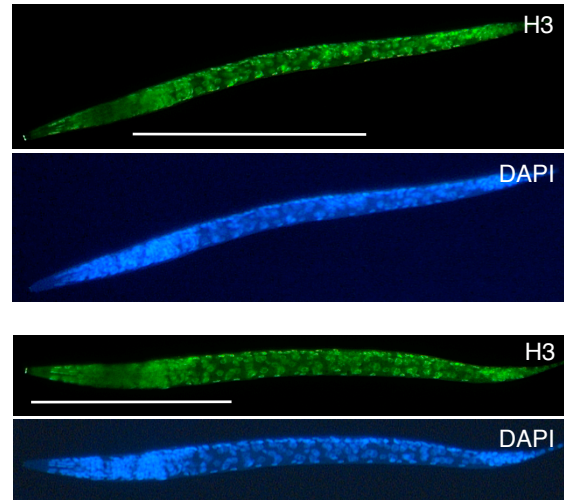

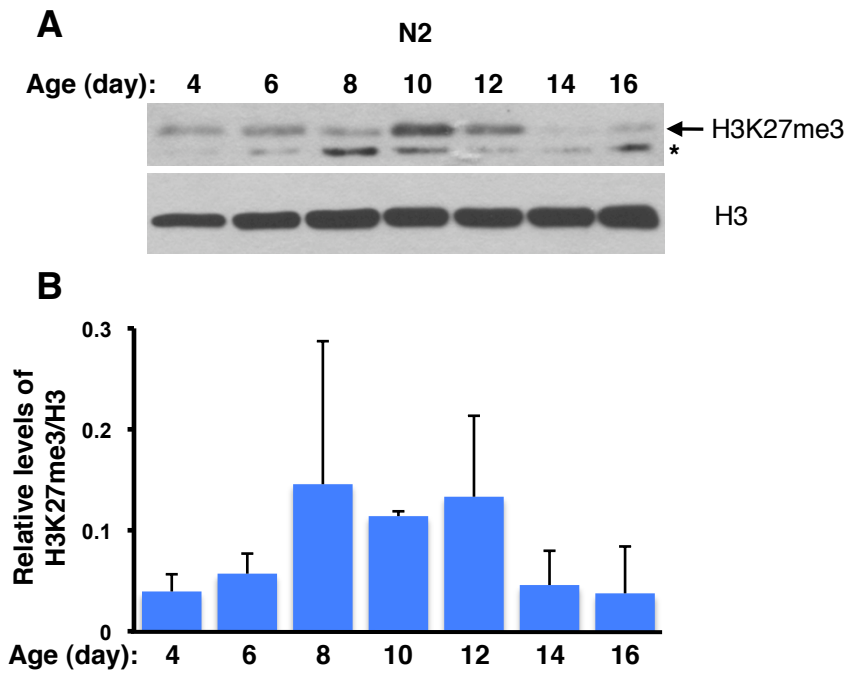

**Supplementary Fig. 3**
